# Supplementary material for: The pharmacological perturbation of brain zinc impairs BDNF-related signaling and the cognitive performances of young mice
Source: PubMed Central journal article supplement (PMC6021411; doi:10.1038/s41598-018-28083-9), 2018-06-27
Supplement: 41598_2018_28083_MOESM1_ESM.pdf [file 41598_2018_28083_MOESM1_ESM.pdf]

**The pharmacological perturbation of brain zinc impairs BDNF-related signaling and the cognitive performances of young mice**

Valerio Frazzini \*, Alberto Granzotto \*, Manuela Bomba, Noemi Massetti, Vanessa Castelli, Marco d'Aurora, Miriam Punzi, Mariangela Iorio, Alessandra Mosca, Stefano Delli Pizzi, Valentina Gatta, Annamaria Cimini, Stefano L. Sensi

## Supplementary figure 1

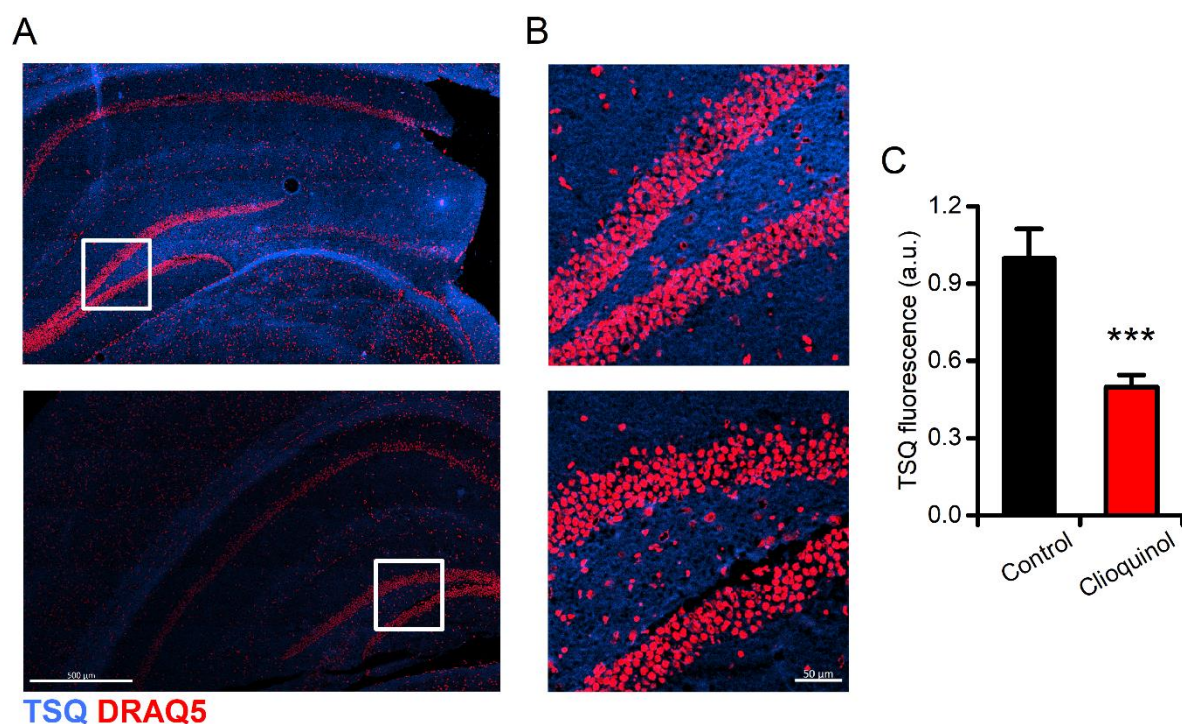

**Supplementary figure 1. CQ administration reduces chelatable zinc in the brain.** TSQ staining was employed to assess levels of chelatable  $Zn^{2+}$  in the hilus of the hippocampal dentate gyrus (DG). (A) Representative images of brain sections obtained from vehicle- (left) and CQ-treated (right) mice. (B) Magnification of the hilus of the DG as in (A). (C) The bar graph shows the quantification obtained from images in A (TSQ normalized fluorescence in vehicle-treated  $1.00 \pm 0.11$  vs  $0.49 \pm 0.04$  in CQ-treated mice,  $n=6-8$  brain slices from vehicle- and CQ-treated mice,  $p < 0.001$ ). “\*\*\*” indicates  $p < 0.001$

## Supplementary figure 2

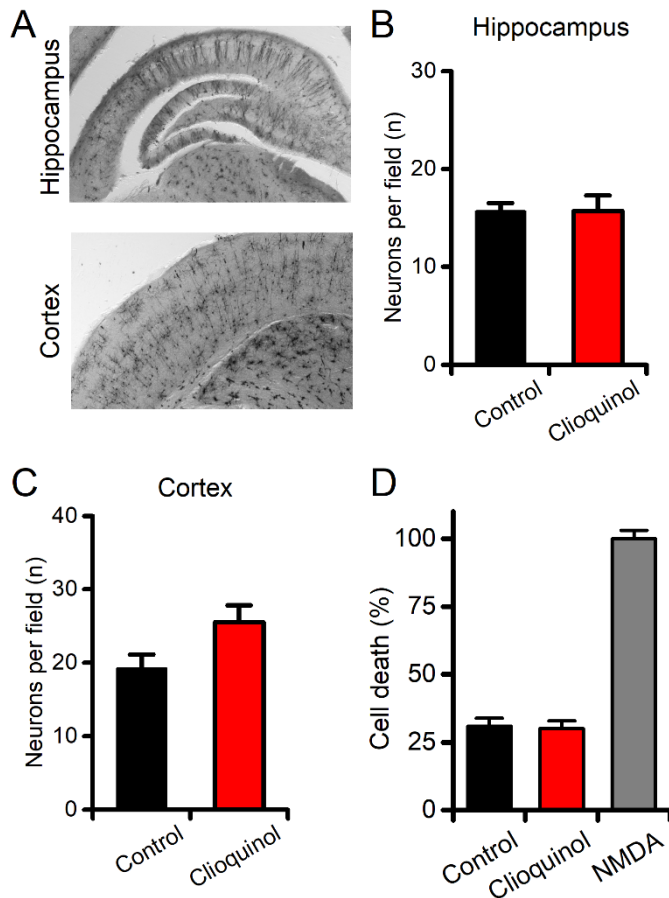

### Supplementary figure 2. CQ supplementation does not affect neuronal viability. (A)

Representative images of Golgi-stained brain sections obtained from vehicle- (left) and CQ-treated (right) mice. The Golgi-staining was employed as an indirect index of neuronal viability. The viability was evaluated as the average number of neurons per field in slices obtained from vehicle- and CQ-treated mice. (B-C) Bar graphs depict the quantification of the average number of Golgi-stained neurons per field (Hippocampus:  $15.62 \pm 0.87$  for control vs  $15.72 \pm 1.55$  for CQ-treated mice,  $n=4$  per condition,  $p=0.87$ ; Cortex:  $19.20 \pm 1.92$  for control vs  $25.52 \pm 2.30$  for CQ-treated mice,  $n=4$  per condition,  $p=0.08$ ). (D) Bar graph depicts the viability of cultured hippocampal neurons exposed to CQ ( $10 \mu\text{M}$ ) or vehicle for 3 days. Neuronal viability was assessed by LDH efflux assay and results normalized to a set of experiments in which almost complete neuronal death was achieved by exposing cells to toxic levels of NMDA ( $300 \mu\text{M} + 10 \mu\text{M}$  glycine) for 24h (Control  $30.94 \pm 2.88$  vs  $30.08 \pm 2.81$  in CQ-treated cultures,  $n=9$  per condition,  $p=0.83$ ).

**Supplementary table 1. Statistics for the WB experiments shown in main text.**

|                                              |             | Control   | Clioquinol | p      | n | Significance |
|----------------------------------------------|-------------|-----------|------------|--------|---|--------------|
|                                              |             | Mean±SEM  | Mean±SEM   |        |   |              |
| <b>BDNF</b>                                  | Hippocampus | 1.40±0.07 | 0.91±0.06  | 0.002  | 4 | **           |
|                                              | Cerebellum  | 0.21±0.04 | 0.29±0.07  | 0.34   | 4 |              |
|                                              | Cortex      | 1.81±0.06 | 1.30±0.14  | 0.015  | 4 | *            |
|                                              | Striatum    | 0.86±0.09 | 0.50±0.06  | 0.022  | 4 | *            |
| <b>TrkB</b>                                  | Hippocampus | 1.13±0.05 | 0.66±0.12  | 0.013  | 4 | *            |
|                                              | Cerebellum  | 0.54±0.06 | 0.49±0.06  | 0.57   | 4 |              |
|                                              | Cortex      | 2.00±0.08 | 1.71±0.07  | 0.03   | 4 | *            |
|                                              | Striatum    | 1.32±0.07 | 0.78±0.04  | 0.001  | 4 | **           |
| <b>pTrkB/TrkB</b>                            | Hippocampus | 0.74±0.09 | 0.84±0.21  | 0.66   | 3 |              |
|                                              | Cerebellum  | 0.38±0.04 | 0.54±0.19  | 0.47   | 3 |              |
|                                              | Cortex      | 0.56±0.07 | 0.43±0.01  | 0.15   | 3 |              |
|                                              | Striatum    | 0.49±0.01 | 0.55±0.09  | 0.56   | 3 |              |
| <b>PSD95</b>                                 | Hippocampus | 0.89±0.03 | 0.69±0.04  | 0.02   | 3 | *            |
|                                              | Cerebellum  | 0.24±0.03 | 0.20±0.03  | 0.45   | 3 |              |
|                                              | Cortex      | 1.62±0.04 | 1.29±0.04  | 0.007  | 3 | **           |
|                                              | Striatum    | 1.20±0.05 | 0.71±0.08  | 0.008  | 3 | **           |
| <b>pERK5/ERK5</b>                            | Hippocampus | 0.91±0.08 | 0.34±0.03  | 0.002  | 3 | **           |
|                                              | Cerebellum  | 0.41±0.03 | 0.43±0.01  | 0.57   | 3 |              |
|                                              | Cortex      | 0.80±0.03 | 0.52±0.06  | 0.019  | 3 | *            |
|                                              | Striatum    | 0.54±0.08 | 0.26±0.02  | 0.03   | 3 | *            |
| <b>proBDNF</b>                               | Hippocampus | 1.22±0.06 | 0.91±0.05  | 0.02   | 3 | *            |
|                                              | Cerebellum  | 0.28±0.04 | 0.20±0.02  | 0.18   | 3 |              |
|                                              | Cortex      | 1.19±0.10 | 0.64±0.07  | 0.01   | 3 | *            |
|                                              | Striatum    | 0.63±0.05 | 0.23±0.05  | 0.006  | 3 | **           |
| <b>p75NTR</b>                                | Hippocampus | 1.16±0.07 | 1.49±0.04  | 0.01   | 3 | *            |
|                                              | Cerebellum  | 0.30±0.03 | 0.44±0.06  | 0.11   | 3 |              |
|                                              | Cortex      | 2.47±0.03 | 2.74±0.02  | 0.002  | 3 | **           |
|                                              | Striatum    | 0.22±0.03 | 0.93±0.03  | <0.001 | 3 | ***          |
| <b>pERK<sub>1,2</sub>/ ERK<sub>1,2</sub></b> | Hippocampus | 0.54±0.05 | 0.88±0.08  | 0.03   | 3 | *            |
|                                              | Cerebellum  | 0.20±0.01 | 0.24±0.01  | 0.10   | 3 |              |
|                                              | Cortex      | 1.59±0.13 | 2.13±0.07  | 0.02   | 3 | **           |
|                                              | Striatum    | 0.98±0.01 | 1.22±0.069 | 0.03   | 3 | **           |

Data are represented as mean ± SEM. “\*” indicates p < 0.05, “\*\*” indicates p < 0.01, and “\*\*\*” indicates p < 0.001.
